# Supplementary material
Source: HighWire-hosted journal article supplement (https://jnis.bmj.com/content/10/5/424)

**SUPPLEMENTARY MATERIAL**

**Figure 1.** The relationship between time from stroke onset to admission at emergency department of intervention center and the following time to groin puncture. Each dot represents one patient, the blue line is the fitted regression line with 95% confidence bands.


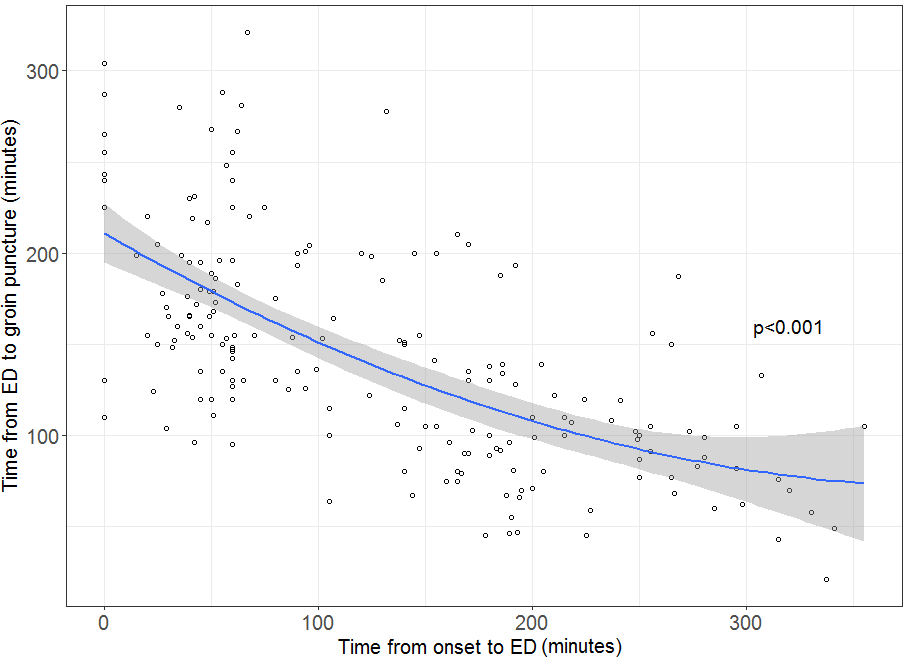


**Figure 2.** The relationship between the median time from stroke onset to groin puncture and the treatment effect on functional outcome (adjusted common odds ratio) of different trials. Each dot represents one trial, the dashed line is the fitted regression line with 95% confidence bands.


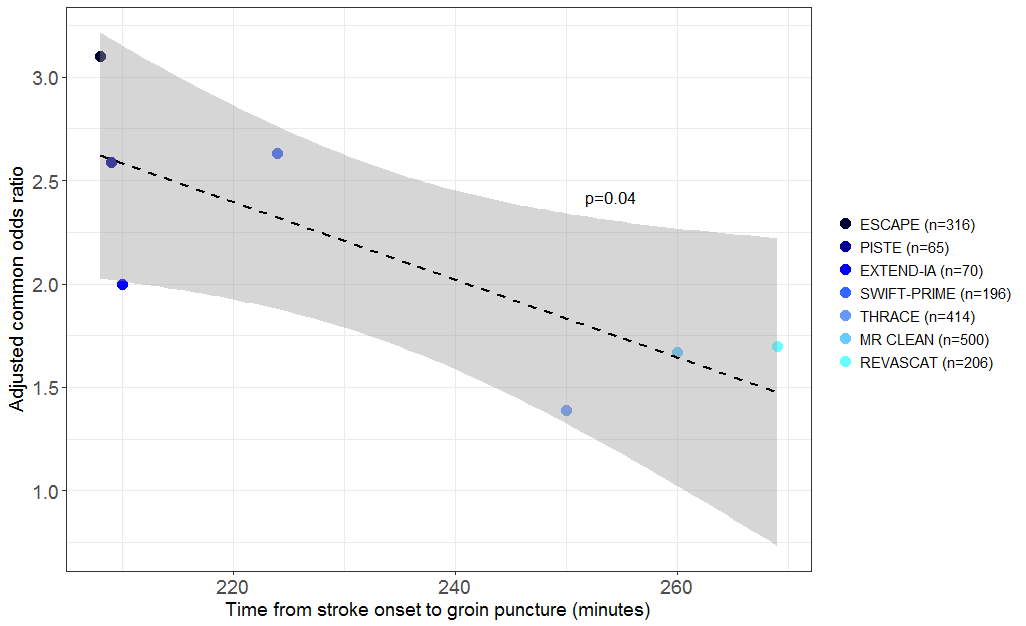

Supplement: inline-supplementary-material-1 [file inline-supplementary-material-1.docx]
